# Supplementary material
Source: Research Square preprint supplement (doi:10.21203/rs.3.rs-9004768/v1)
Supplement: Supplementary file 1 [file 63bacbfd0d392cda10c81f3c.docx]

**Supplementary materials**

**
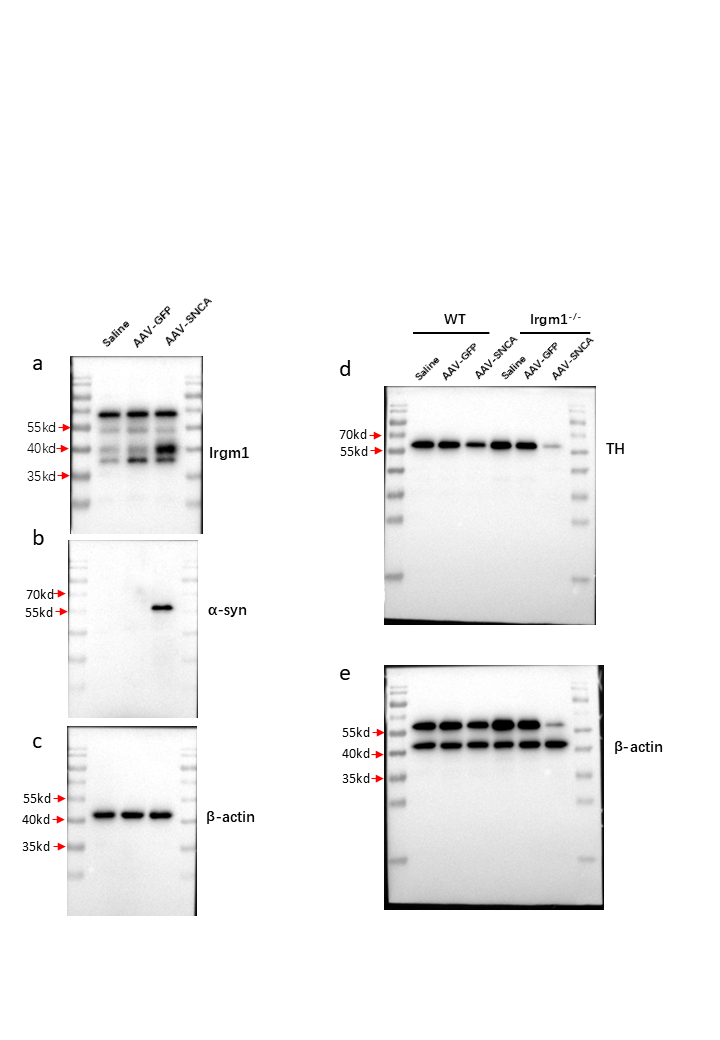
**

**Figure S1.** The uncropped images of the original western blots shown in manuscript Fig. 1, (a) The original western blot of Irgm1 (shown in manuscript Fig. 1a). (b) The original western blot of α-syn (shown in manuscript Fig. 1a). (c) The original western blot of β-actin (shown in manuscript Fig. 1a). (d) The original western blot of TH (shown in manuscript Fig. 1h). (e) The original western blot of β-actin (shown in manuscript Fig. 1h).


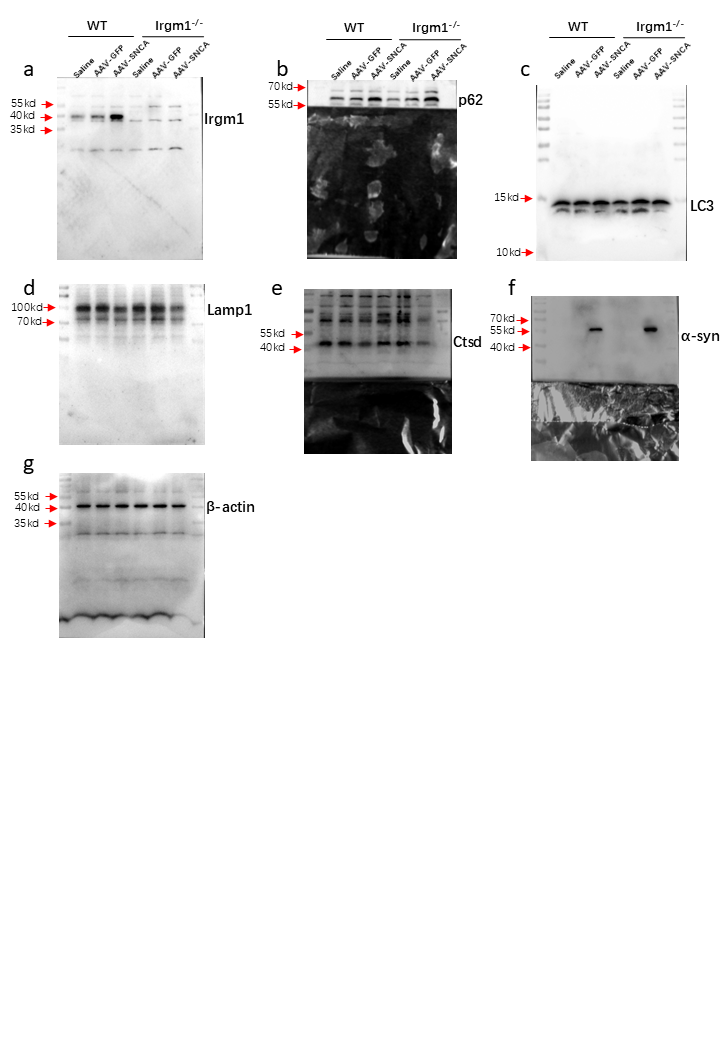


**Figure S2.** The uncropped images of the original western blots shown in manuscript Fig. 2a, (a) The original western blot of Irgm1. (b) The original western blot of p62. (c) The original western blot of LC3. (d) The original western blot of Lamp1. (e) The original western blot of Ctsd. (f) The original western blot of α-syn. (g) The original western blot of β-actin.


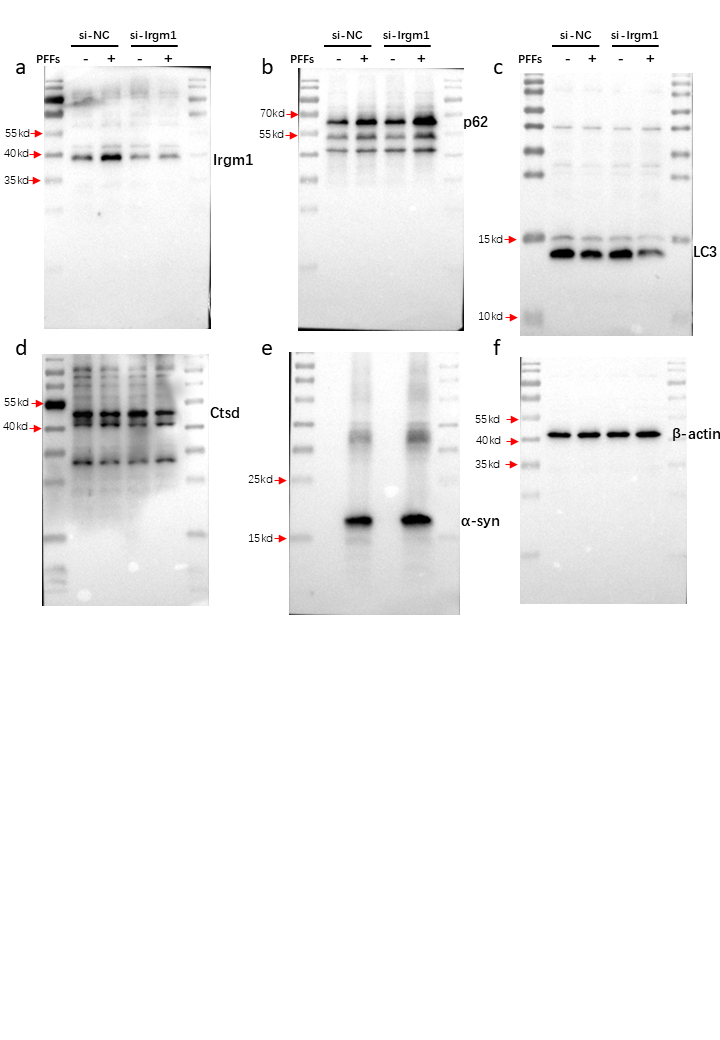


**Figure S3.** The uncropped images of the original western blots shown in manuscript Fig. 2d, (a) The original western blot of Irgm1. (b) The original western blot of p62. (c) The original western blot of LC3. (d) The original western blot of Ctsd. (e) The original western blot of α-syn. (f) The original western blot of β-actin.

**
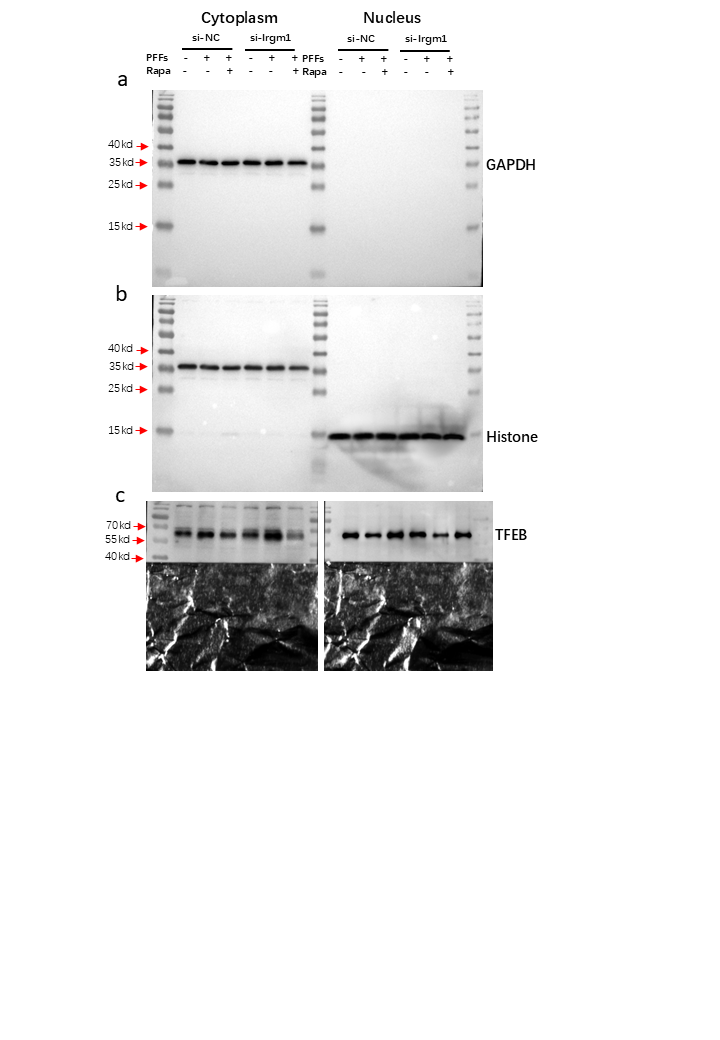
**

**Figure S4.** The uncropped images of the original western blots shown in manuscript Fig. 3a, (a) The original western blot of GAPDH in cytoplasm. (b) The original western blot of Histone in nucleus. (c) The original western blot of TFEB in cytoplasm and nucleus.

**
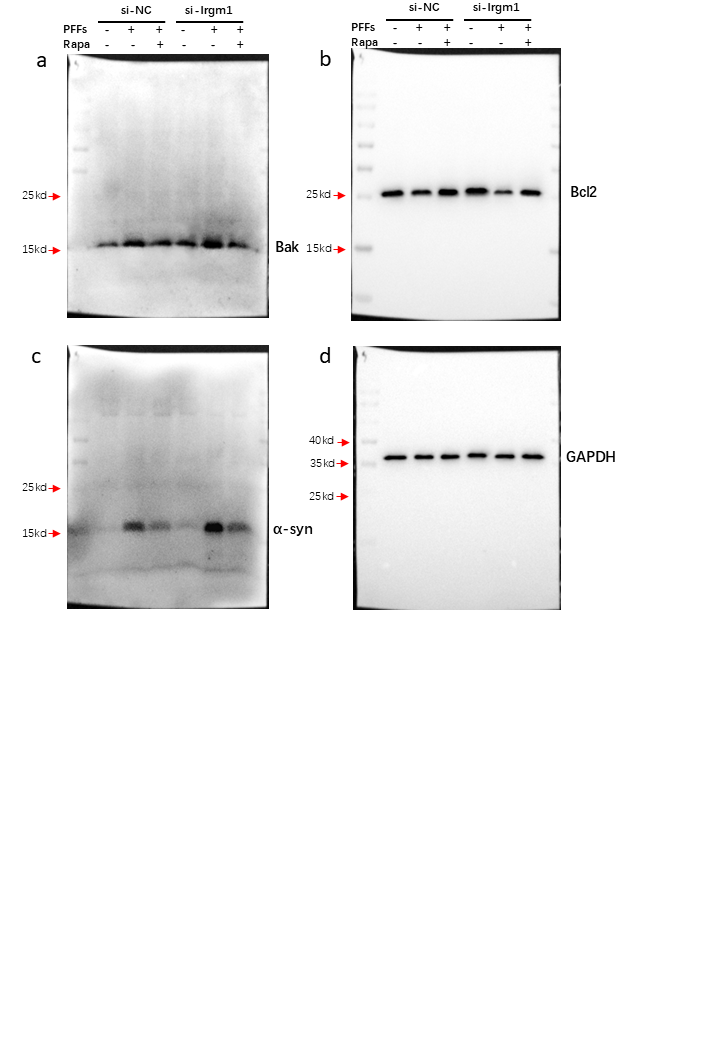
**

**Figure S5.** The uncropped images of the original western blots shown in manuscript Fig. 4a, (a) The original western blot of Bak. (b) The original western blot of Bcl2. (c) The original western blot of α-syn. (d) The original western blot of GAPDH.
